# Supplementary material for: Genomic epidemiology of Staphylococcus aureus isolated from bloodstream infections in South America during 2019 supports regional surveillance
Source: PubMed Central journal article supplement (PMC10272885; doi:10.1099/mgen.0.001020), 2023-05-25

**Supplementary Figure 1.** Sampling map of StaphNET-SA study surveillance sites. Coloured pie charts depict the distribution of MRSA (red) and MSSA (light blue); the pie size is scaled according to the number of isolates collected at each site.

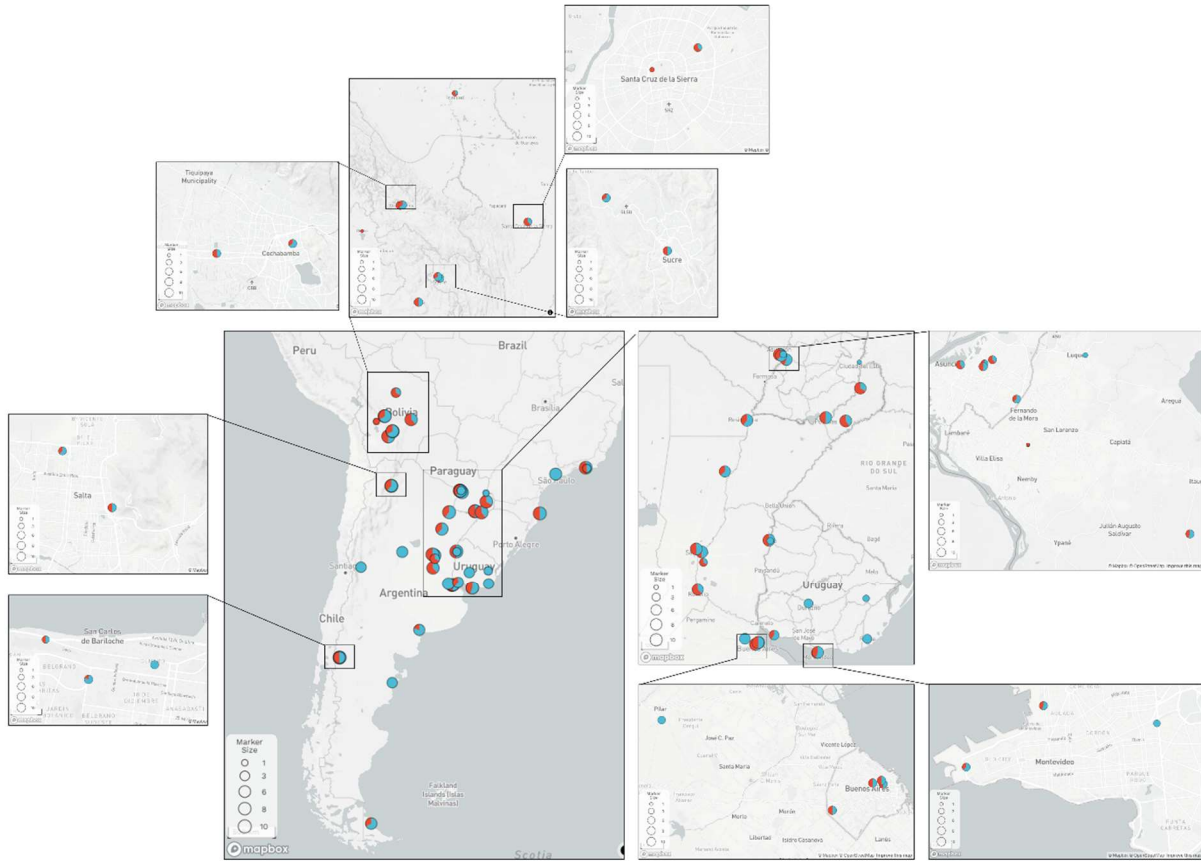

Supplement: mgen-9-1020-s001.pdf [file mgen-9-1020-s001.pdf]
