# Supplementary material for: Genomic epidemiology of Staphylococcus aureus isolated from bloodstream infections in South America during 2019 supports regional surveillance
Source: PubMed Central journal article supplement (PMC10272885; doi:10.1099/mgen.0.001020), 2023-05-25

**Supplementary Figure 2.** Diagram flow showing confirmation and quality control performed on *S. aureus* isolates and genomes in this study.

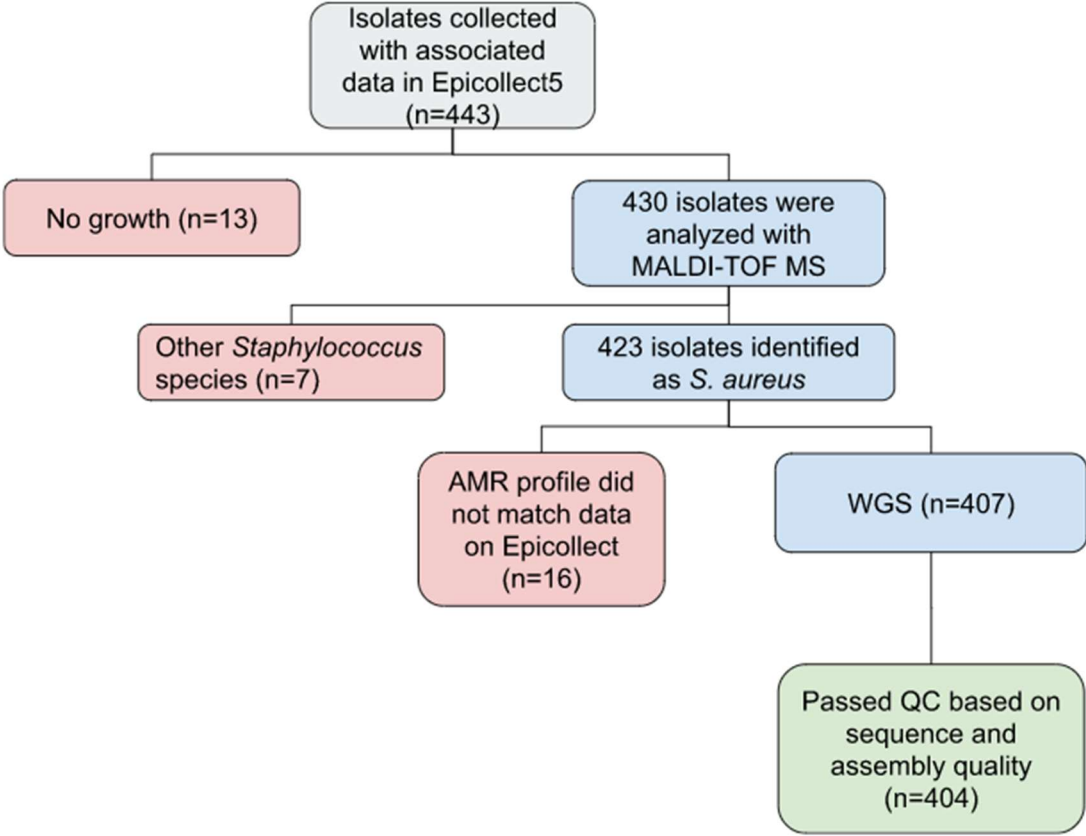

Supplement: mgen-9-1020-s002.pdf [file mgen-9-1020-s002.pdf]
