# Supplementary material for: Genomic epidemiology of Staphylococcus aureus isolated from bloodstream infections in South America during 2019 supports regional surveillance
Source: PubMed Central journal article supplement (PMC10272885; doi:10.1099/mgen.0.001020), 2023-05-25

**Supplementary Figure 3.** Distribution of clonal complexes in the 404 *S. aureus* genomes by MRSA or MSSA. STs comprising less than 3 genomes are grouped under “Others”. Bars are coloured as described in the legend.

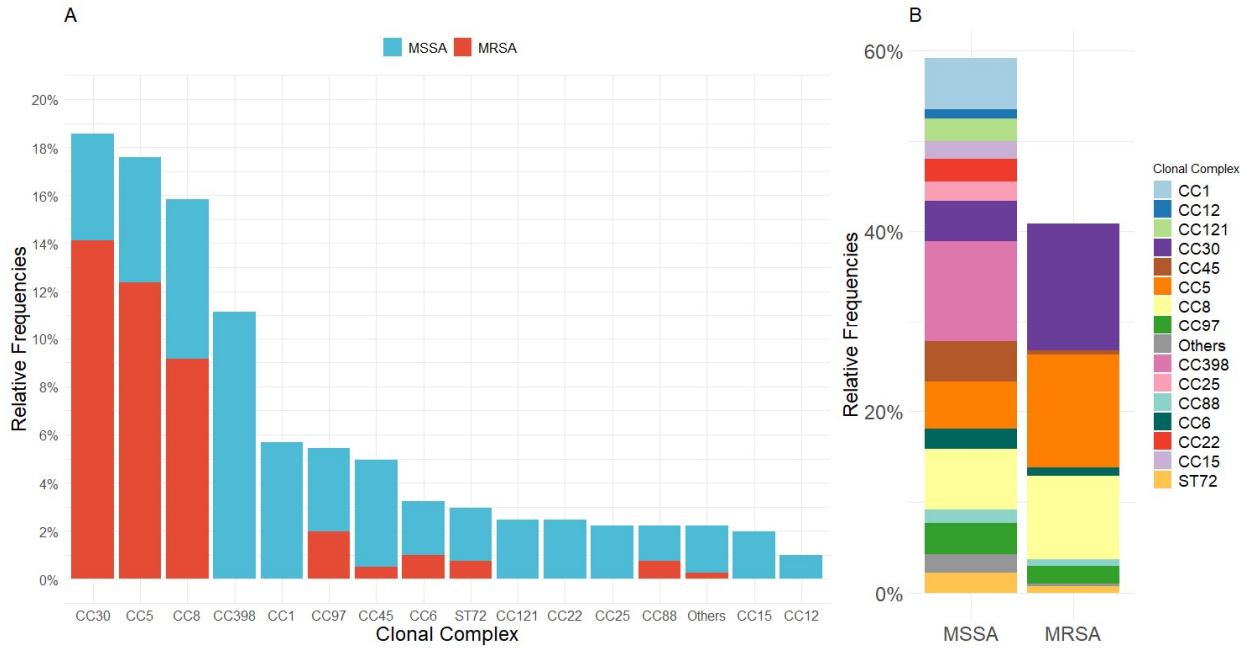

Supplement: mgen-9-1020-s003.pdf [file mgen-9-1020-s003.pdf]
