# Supplementary material for: Genomic epidemiology of Staphylococcus aureus isolated from bloodstream infections in South America during 2019 supports regional surveillance
Source: PubMed Central journal article supplement (PMC10272885; doi:10.1099/mgen.0.001020), 2023-05-25

**Supplementary Figure 4.** AMR determinants and AMR phenotypes. Maximum Likelihood tree of 404 genomes inferred from 156868 SNP sites identified on 2182 core genes (Panaroo) with RAxML. Midpoint rooted. 500 bootstrap replicates. Tree nodes and blocks are coloured as described in the legend.

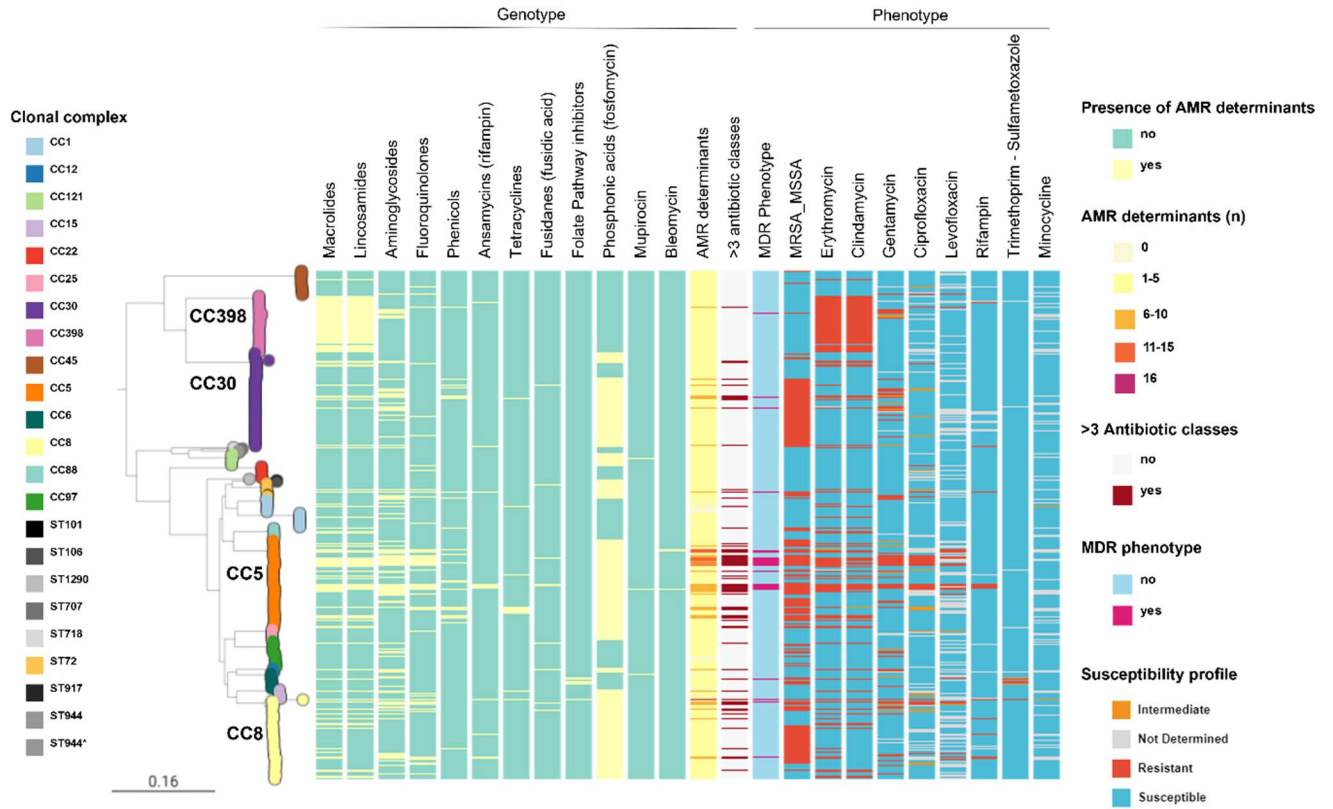

Supplement: mgen-9-1020-s004.pdf [file mgen-9-1020-s004.pdf]
